# Supplementary material for: Allopolyploidization from two dioecious ancestors leads to recurrent evolution of sex chromosomes
Source: PubMed Central journal article supplement — Nat Commun. 2024 Aug 12;15:6893. doi: 10.1038/s41467-024-51158-3 (PMC11319354; doi:10.1038/s41467-024-51158-3), 2024-08-12
Supplement: 41467_2024_51158_MOESM1_ESM.pdf [file 41467_2024_51158_MOESM1_ESM.pdf]

**Allopolyploidization from two dioecious ancestors leads to recurrent  
evolution of sex chromosomes**

*He et al.*

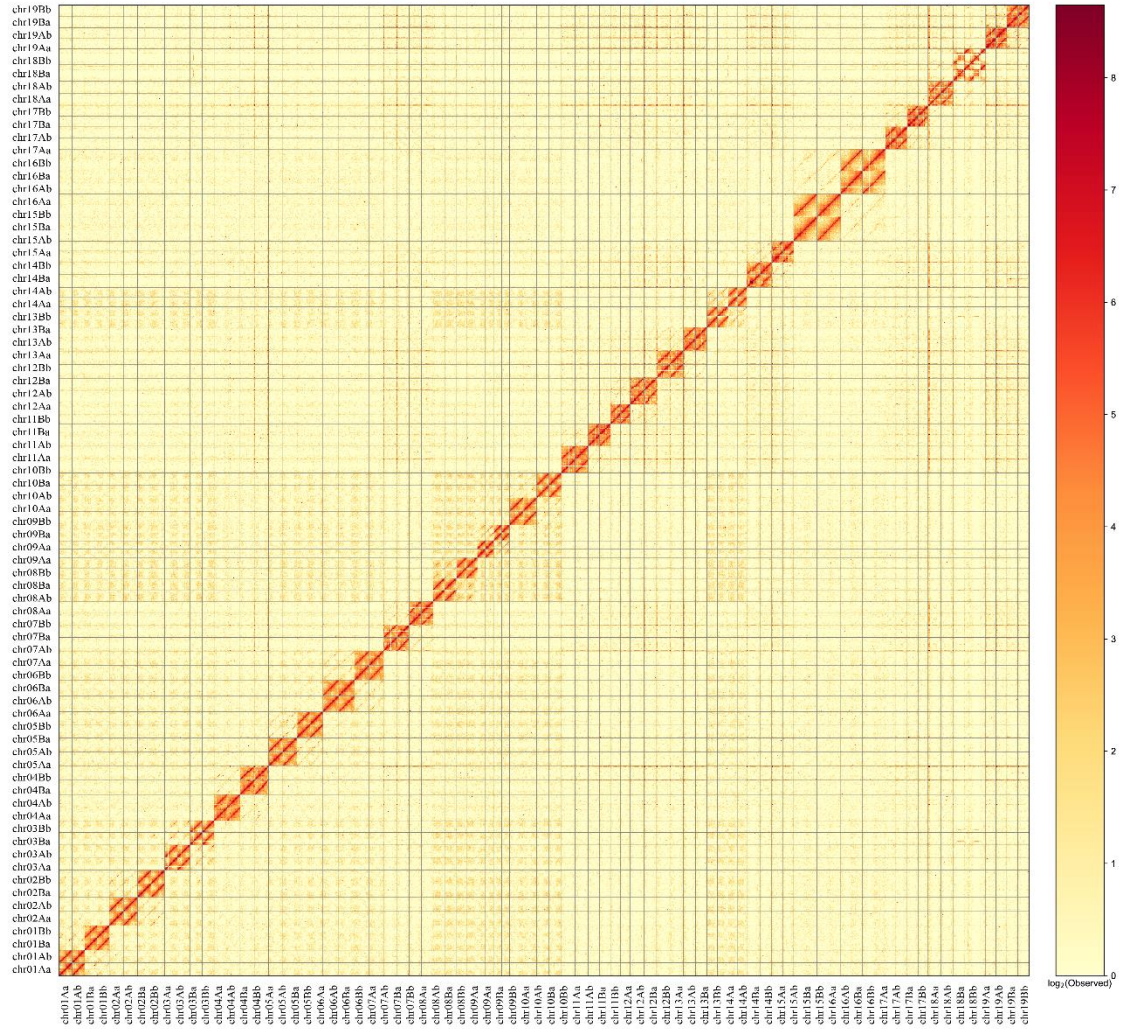

**Supplementary Fig. 1. Genome-wide analysis of chromatin interactions in the *S. babylonica* genome based on Hi-C data. Aa=Sa, Ab=Sb, Ba=Va, Bb=Vb**

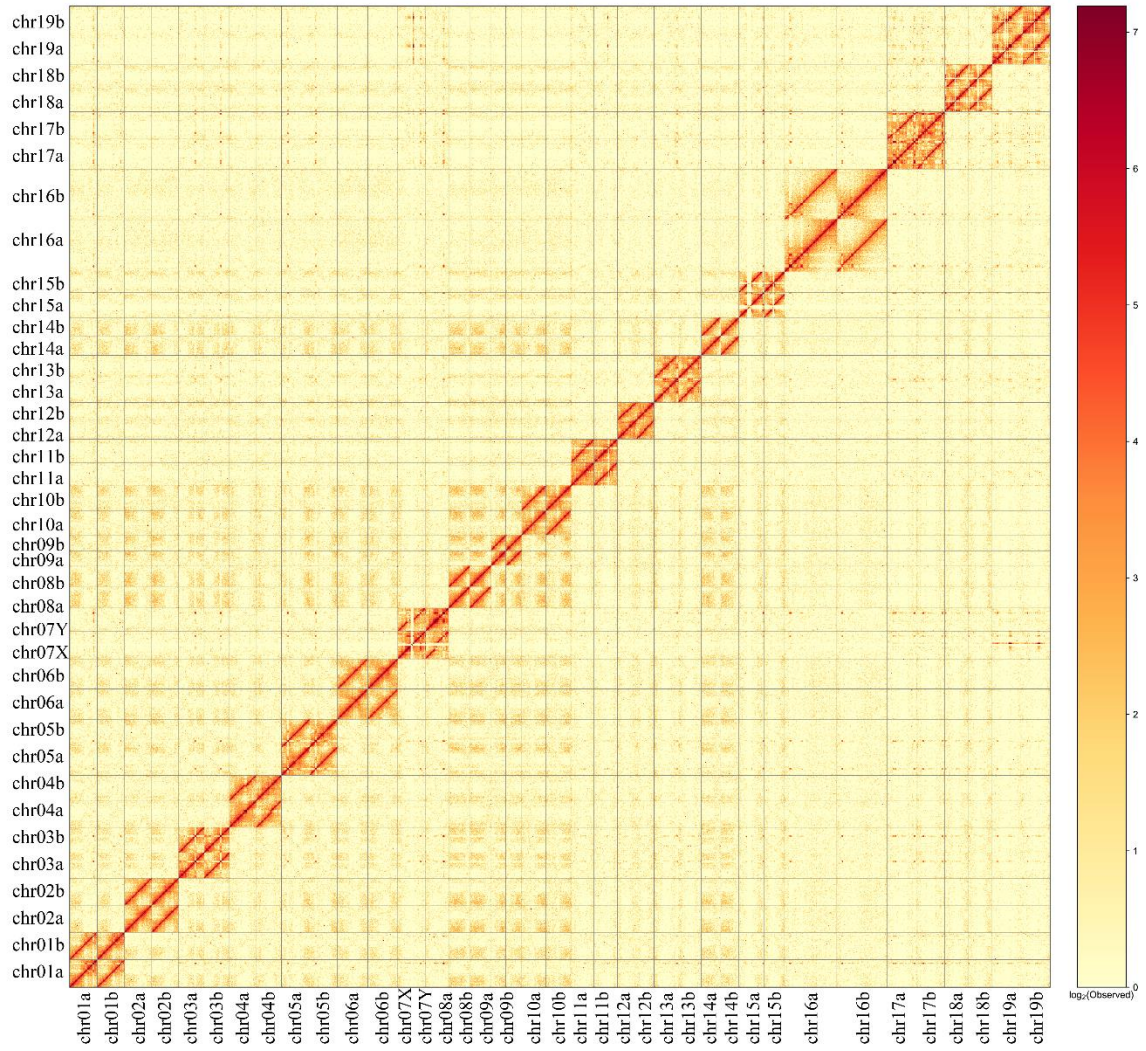

**Supplementary Fig. 2. Genome-wide analysis of chromatin interactions in the *S. dunnii* genome based on Hi-C data.**

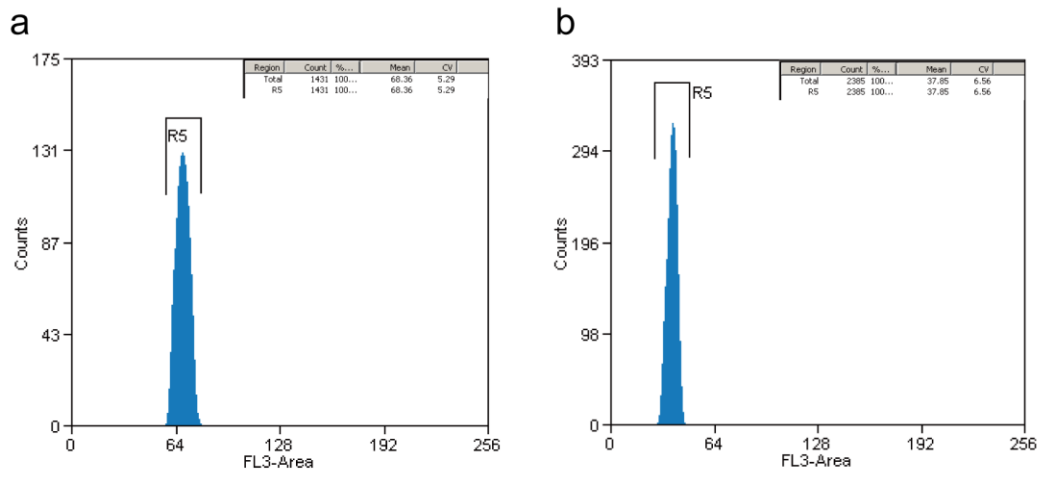

**Supplementary Fig. 3. Flow cytometry histograms of willows. a** *Salix babylonica* (Saba01F). **b** The Saba01F's external standard *S. dunnii* (FNU-M-1).

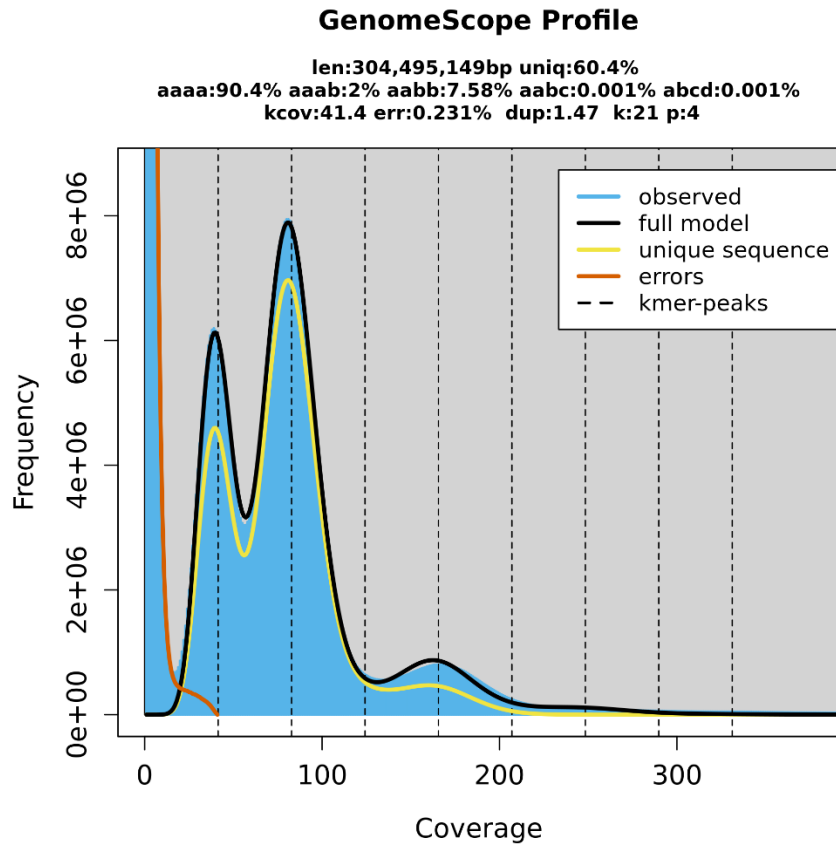

**Supplementary Fig. 4. GenomeScope plots for *Salix babylonica* (Saba01F).** The higher proportion of aabb than aaab (i.e.,  $aaab < aabb$ ) indicates that *S. babylonica* is allotetraploid.



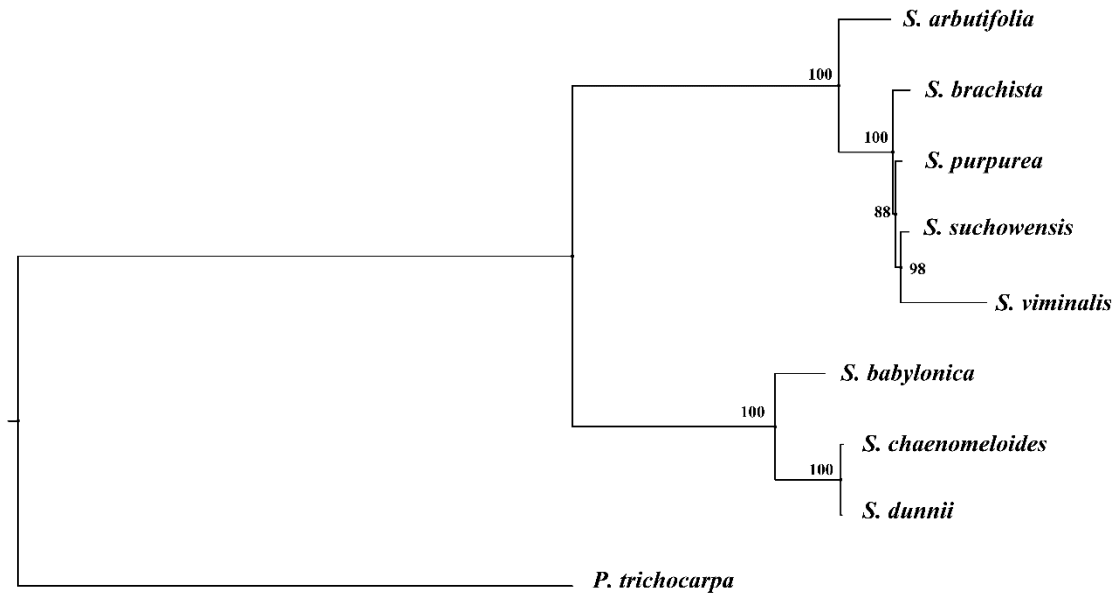

**Supplementary Fig. 5. Phylogenetic tree based on chloroplast genome data.** Numbers marked on the tree represent bootstrap values.

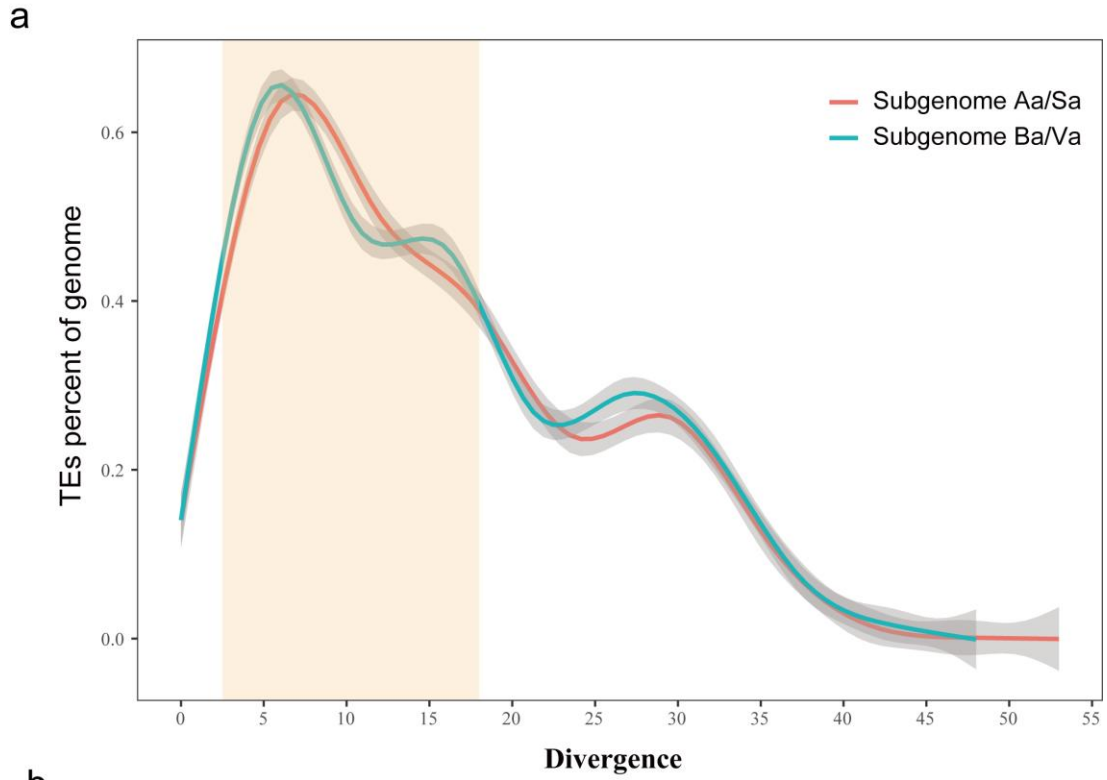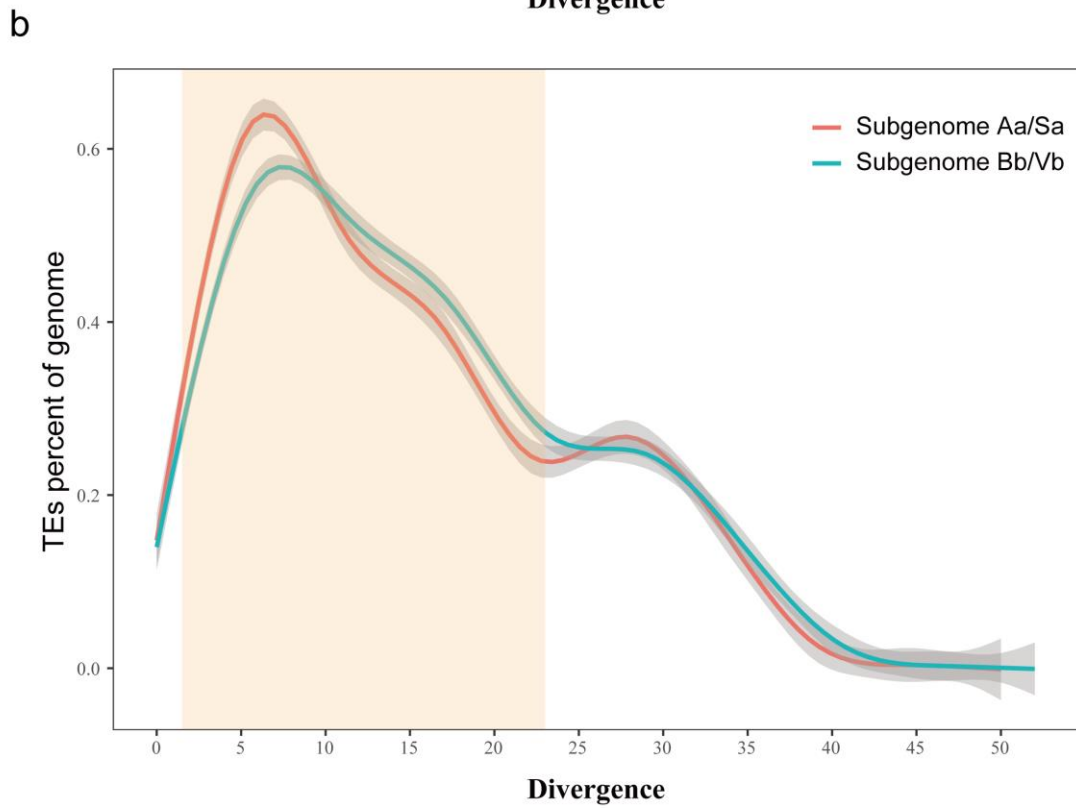

**Supplementary Fig. 6. The distribution of sequence divergence rates of TEs between two subgenomes of *S. babylonica*. a** The divergence landscape of TEs between Aa/Sa and Ba/Va. **b** The divergence landscape of TEs between Aa/Sa and Bb/Vb. Source data are provided as a Source Data file.

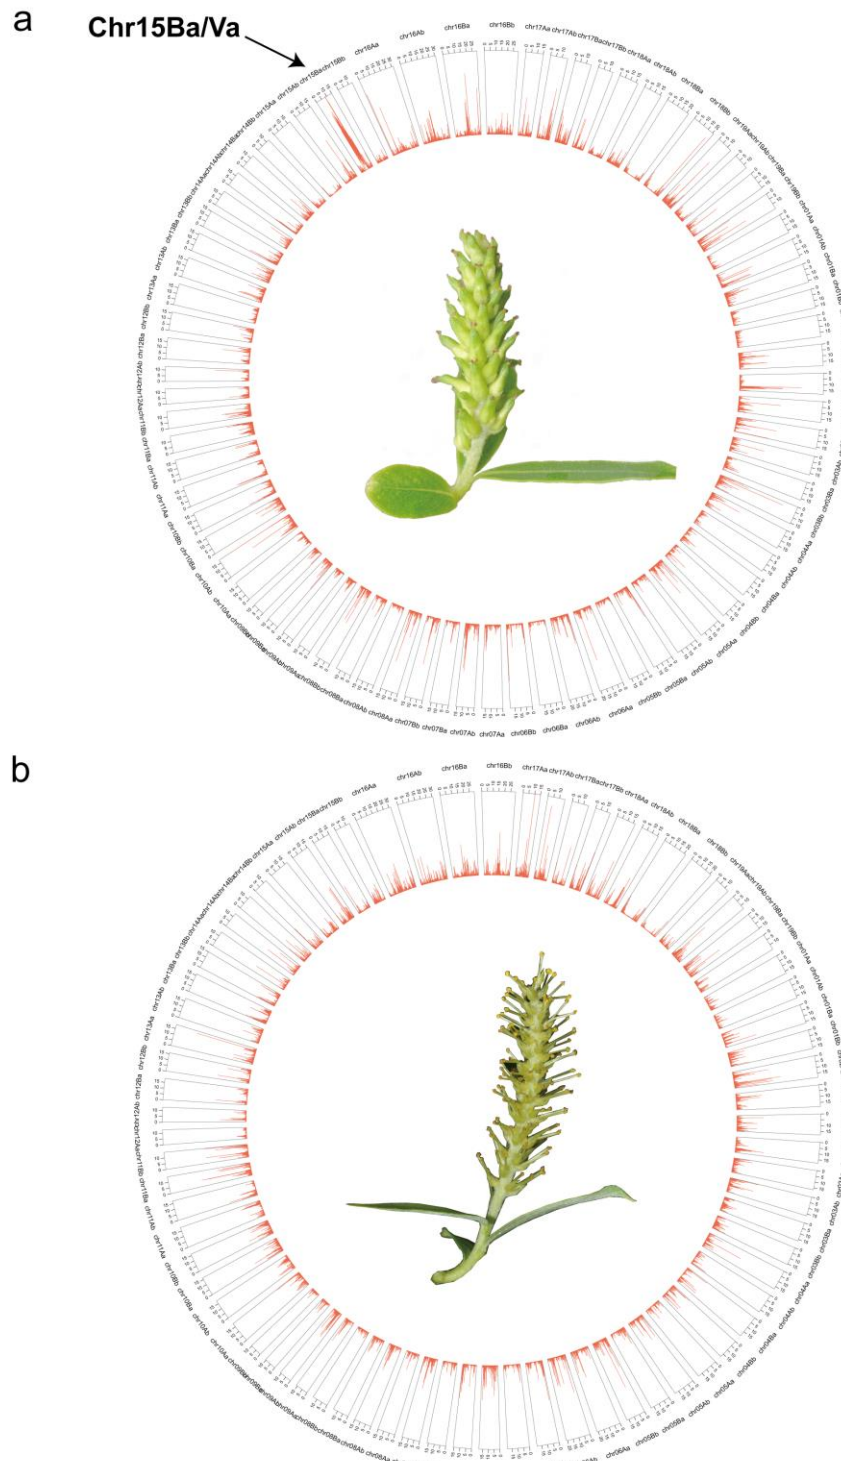

**Supplementary Fig. 7. The female and male specific *k*-mer distribution in *S. babylonica*.** **a** The female specific *k*-mer distribution in *S. babylonica*. Inside the circle is a female catkin. There is a significant signal on chromosome 15Ba/Va. **b** The male specific *k*-mer distribution in *S. babylonica*. Inside the circle is a male catkin. Aa=Sa, Ab=Sb, Ba=Va, and Bb=Vb. Source data are provided as a Source Data file.



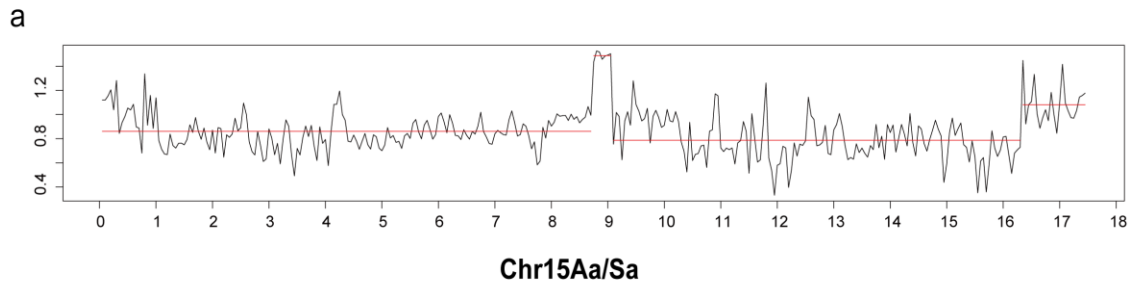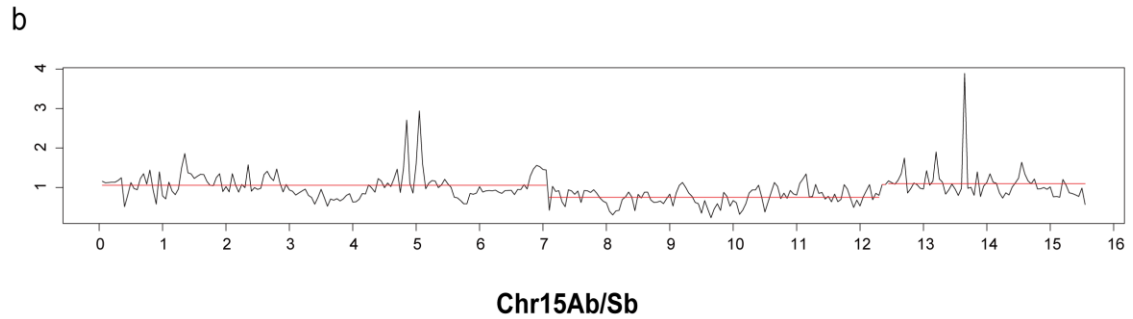

**Supplementary Fig. 8. The CQ results (male vs. female alignments) of *S. babylonica*.** **a** The CQ results on chromosomes 15Aa/Sa. **b** The CQ results on 15Ab/Sb. Source data are provided as a Source Data file.

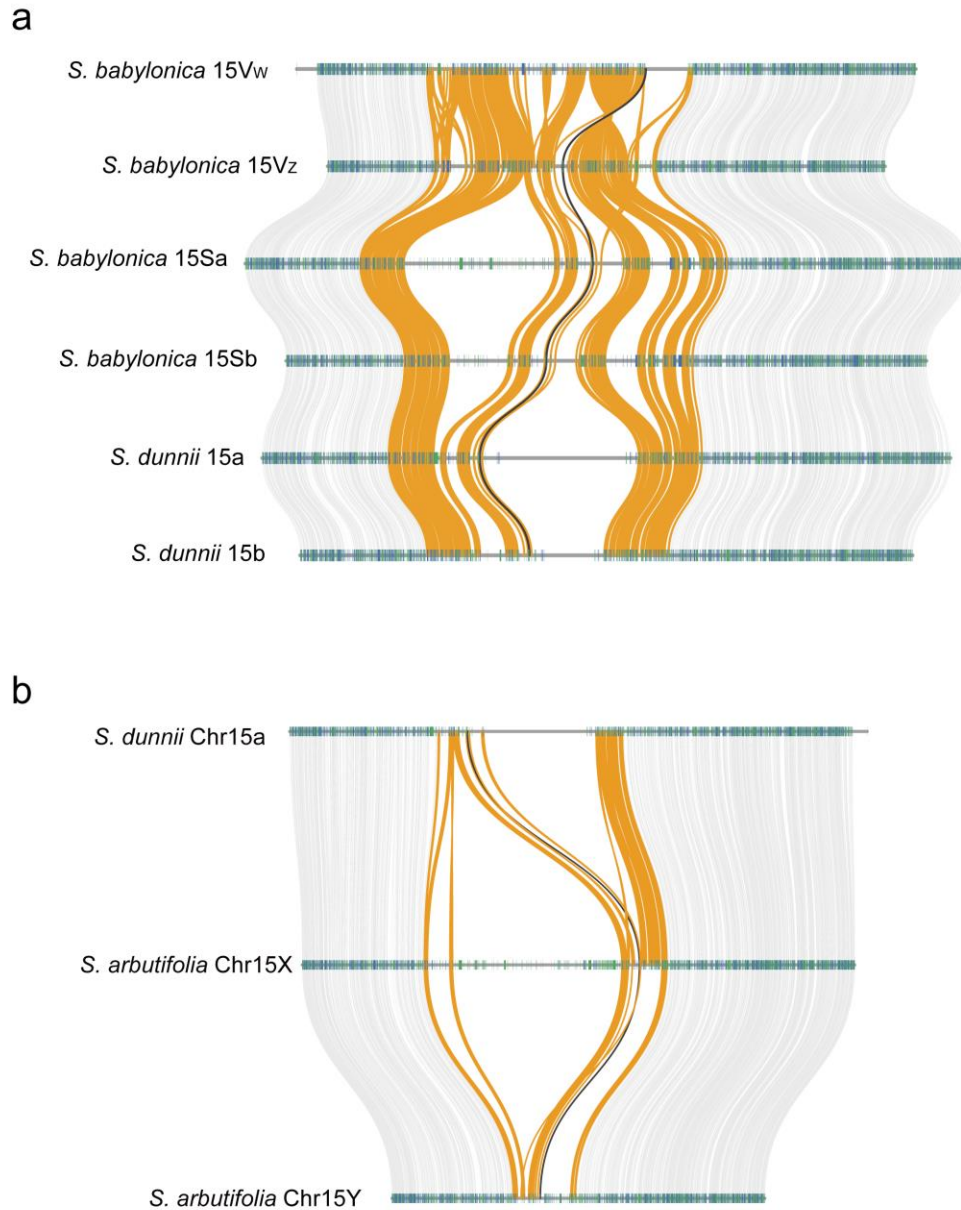

**Supplementary Fig. 9. Synteny between sex chromosomes and their homologous chromosome(s).** **a** The collinearity connection between sex chromosomes of *S. babylonica* (15Vw and 15Vz) and homologous autosomes of *S. babylonica* (15Sa and 15Sb) and *S. dunnii* (15a, 15b). **b** The collinearity connection between sex chromosomes of *S. arbutifolia* (15X and 15Y) and homologous autosomes of *S. dunnii* (15a). The yellow regions represent sex-linked regions, and the black lines connect ancient sex-linked homologous genes. Source data are provided as a Source Data file.

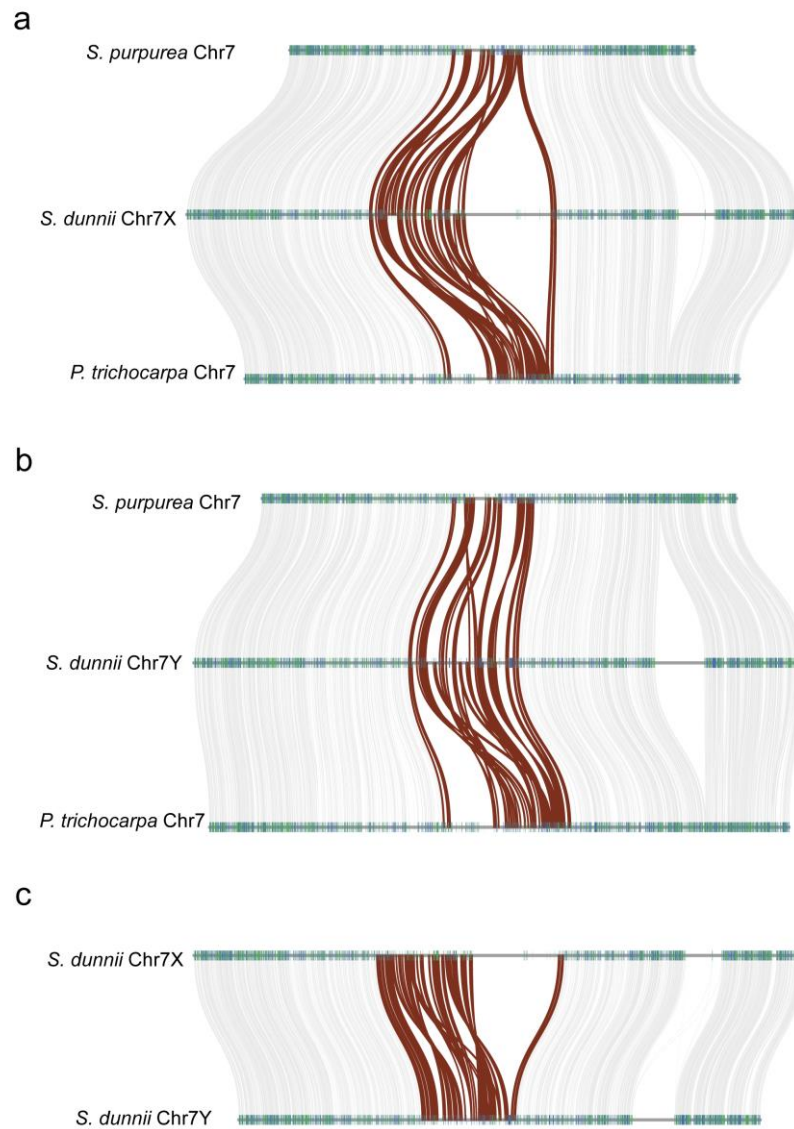

**Supplementary Fig. 10. The collinearity results between sex chromosomes of *S. dunnii* and autosomes of *S. purpurea* and *P. trichocarpa*.** The brown regions represent sex-linked region. **a** The collinearity connection between sex chromosomes of *S. dunnii* 7X and homologous autosomes of *S. purpurea* Chr7 and *P. trichocarpa* Chr7. **b** The collinearity connection between sex chromosomes of *S. dunnii* 7Y and homologous autosomes of *S. purpurea* Chr7 and *P. trichocarpa* Chr7. **c** The collinearity connection between sex chromosomes of *S. dunnii* (7X and 7Y). Source data are provided as a Source Data file.

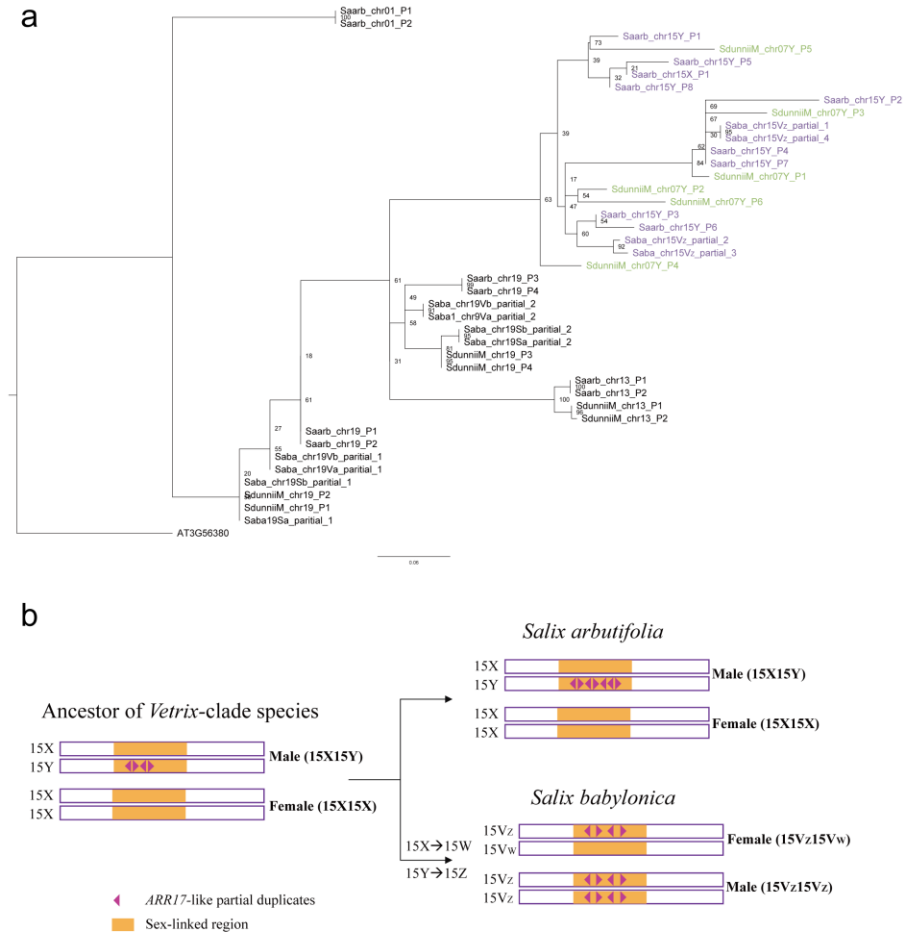

**Supplementary Fig. 11. Evolutionary history of *ARR17*-like partial duplicates.** **a** The phylogeny of *ARR17*-like partial duplicates. Saarb: *S. arbutifolia*, SdunniiM: *S. dunnii*, Saba: *S. babylonica*, AT: *Arabidopsis thaliana*. The purple and green represent genomic contents from ancestor of the *Vetrix*-clade and *Salix*-clade. **b** The evolutionary trajectory of *ARR17*-like partial duplicates in ancestral species, *S. arbutifolia* and *S. babylonica*.

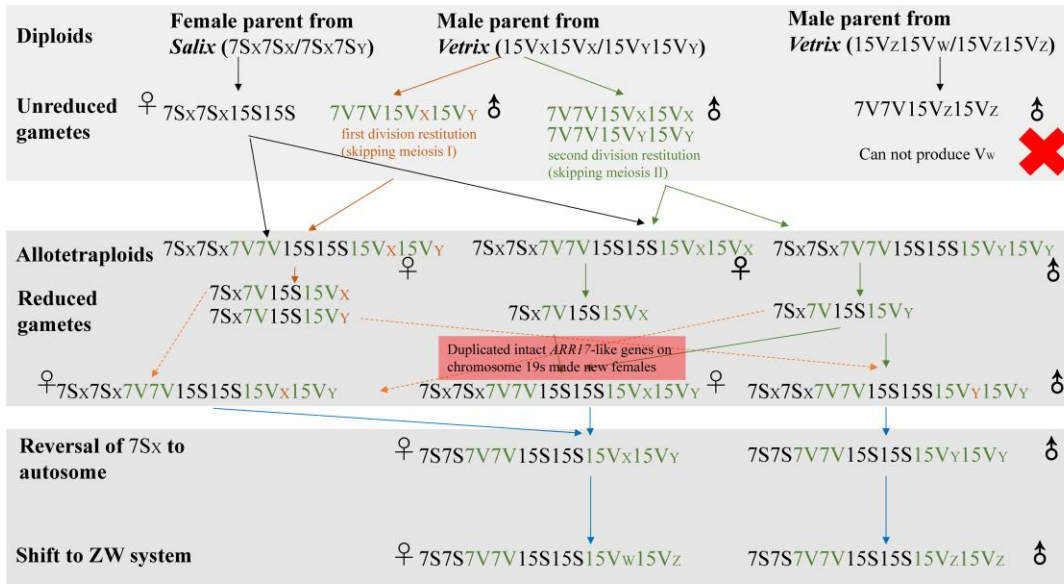

**Supplementary Fig. 12. Hypothetical evolutionary origin of *Salix babylonica*.** Black arrows represent gametes from female progenitor of *Salix* clade. Orange and green arrows represent gametes from male progenitor of *Vetrix* clade, and subsequent evolution routes. Blue arrows represent the X to autosome and XY to ZW transition.

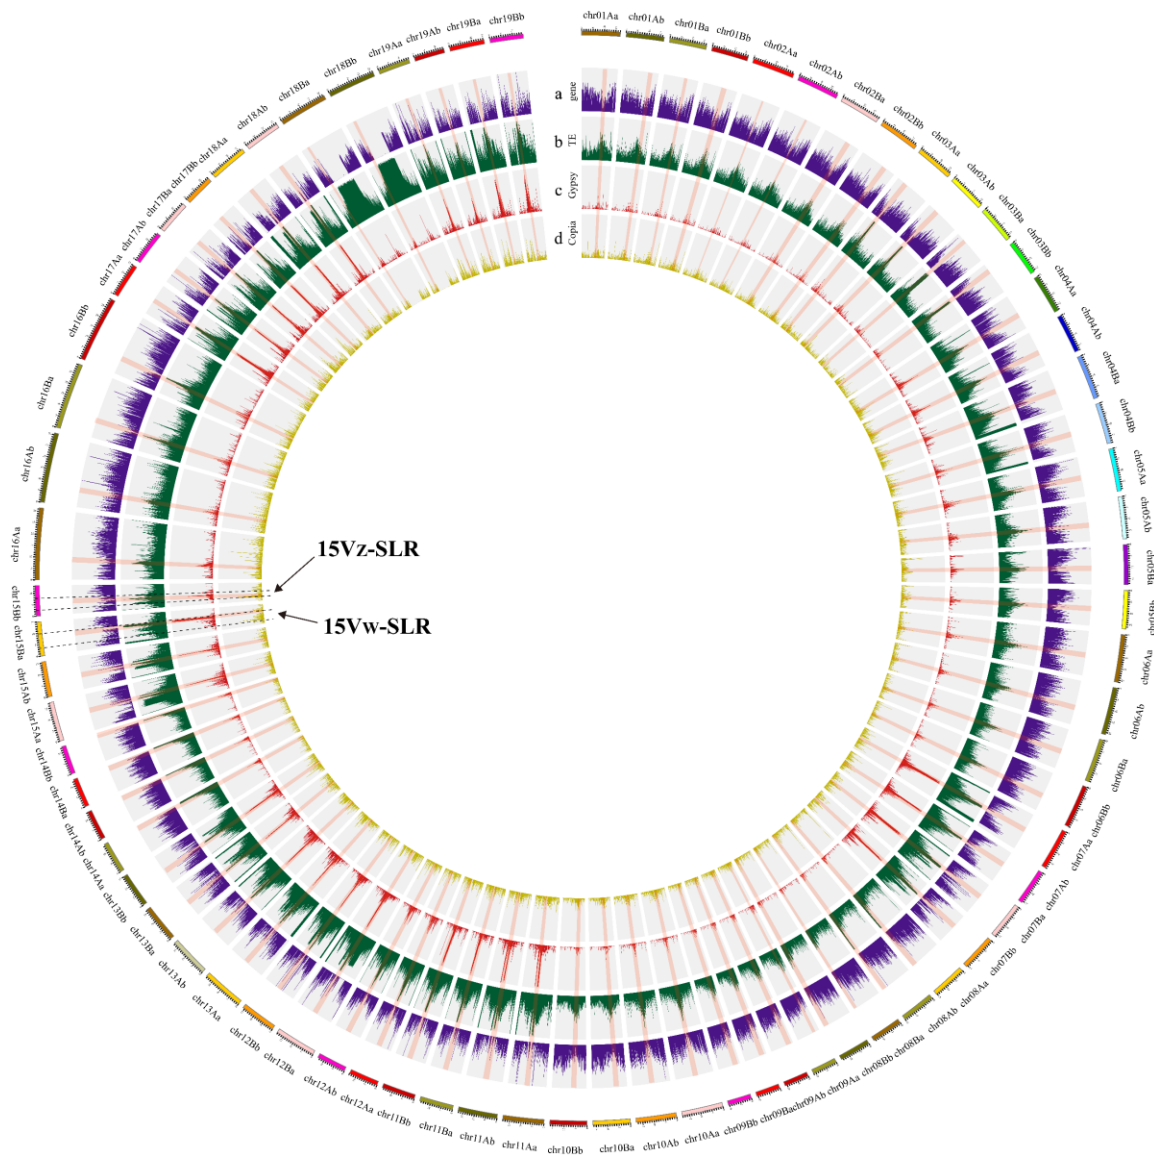

**Supplementary Fig. 13. Genome structure of *S. babylonica*.** (a) gene density, (b) total TE density, (c) LTR-Gypsy density, (d) LTR-Copia density. The orange area indicates the location of the predicted centromere. Aa=Sa, Ab=Sb, Ba=Va, and Bb=Vb. SLR: sex-linked region. Source data are provided as a Source Data file.



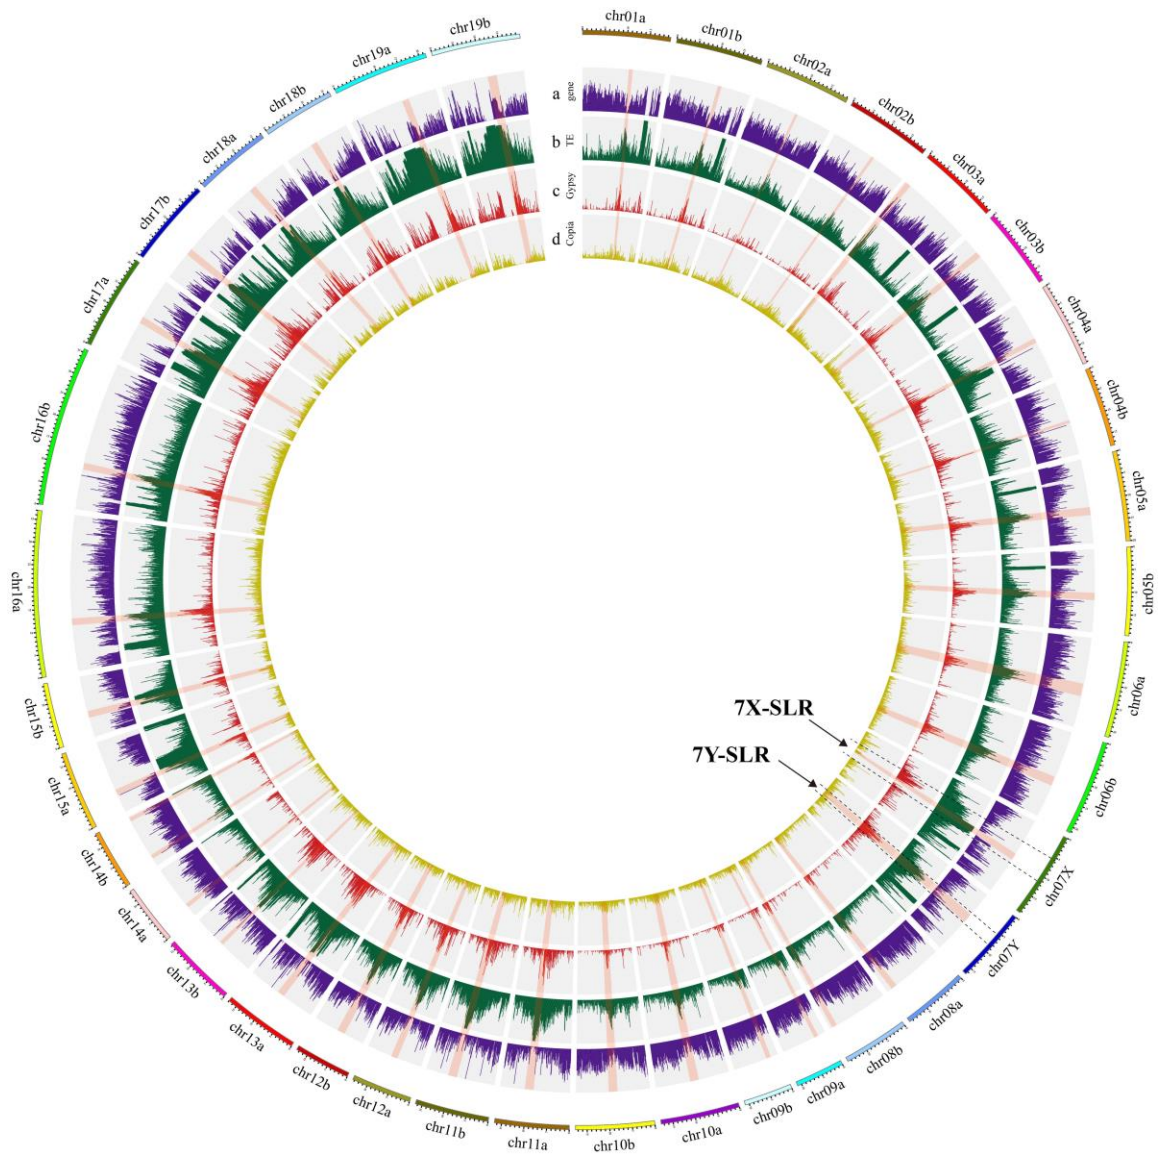

**Supplementary Fig. 14. Genome structure of *S. dunnii*.** (a) gene density, (b) total TE density, (c) LTR-Gypsy density, (d) LTR-Copia density. The orange area indicates the location of the predicted centromere. SLR: sex-linked region. Source data are provided as a Source Data file.

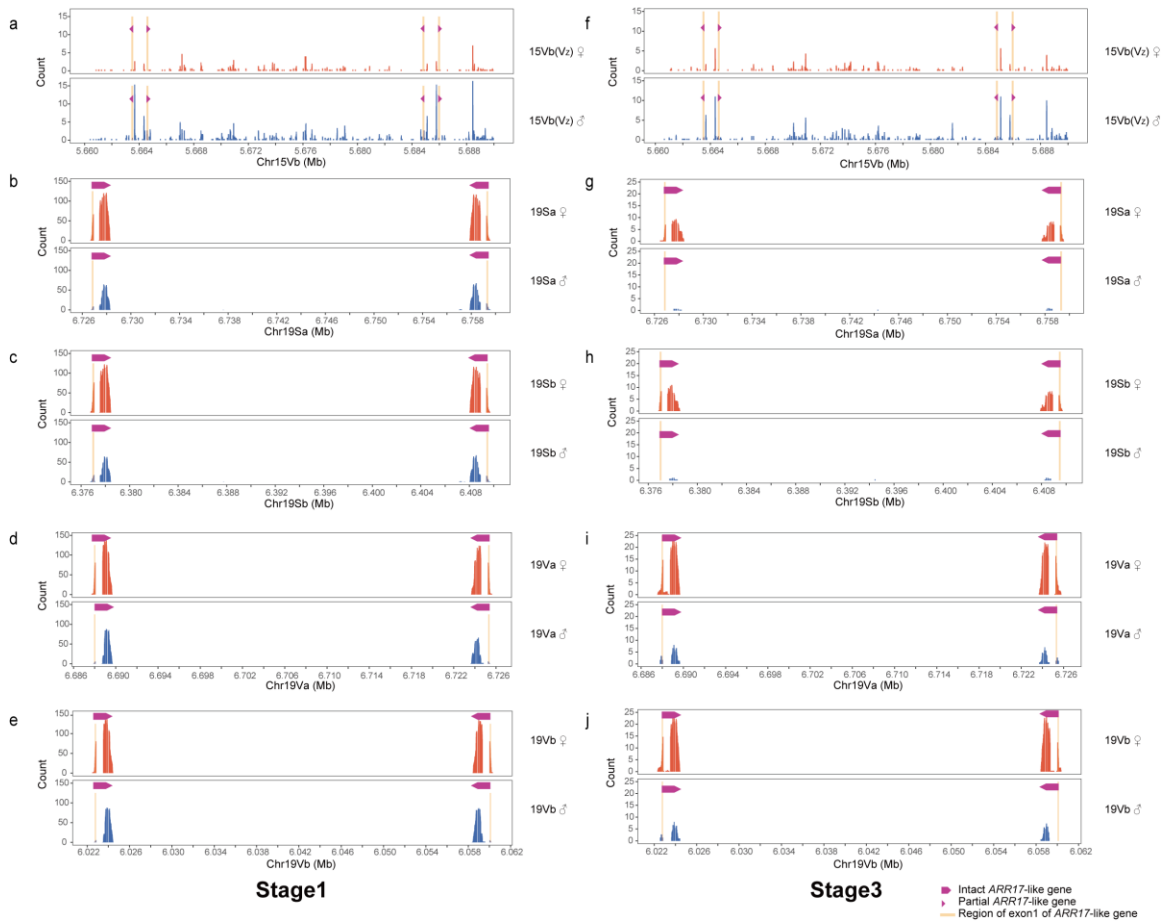

**Supplementary Fig. 15. The expression patterns of *ARR17*-like duplicates in female and male buds. a** (stage 1), **f** (stage 3) Transcript level of small RNAs of partial *ARR17*-like duplicates and around regions on sex chromosome 15VZ. Orange area indicates exon1 of *ARR17*-like copies. **b, c, d, and e** (stage 1); **g, h, i, and j** (stage 3) Transcript level of intact *ARR17*-like genes on Chr19Sa, Chr19Sb, Chr19Va and Chr19Vb. The purple triangles indicate partial *ARR17*-like duplicates (the tip is the end of the duplicate). The purple arrows show the intact *ARR17*-like duplicates (the tip is the end of the gene). Source data are provided as a Source Data file.

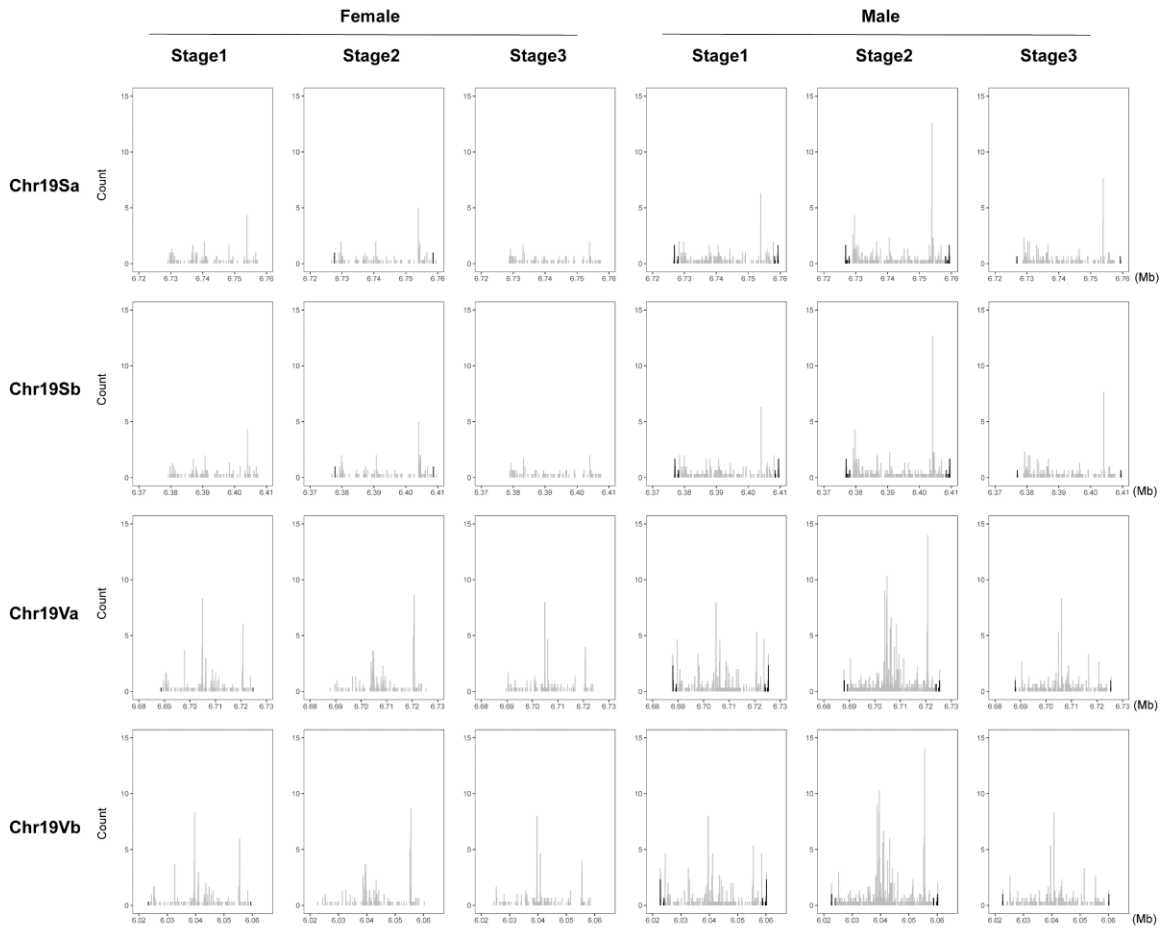

**Supplementary Fig. 16. Transcript level of small RNAs around intact *ARR17*-like duplicates of *S. babylonica*.** Black represents the positions of intact *ARR17*-like duplicates, while grey represents the other regions. Source data are provided as a Source Data file.

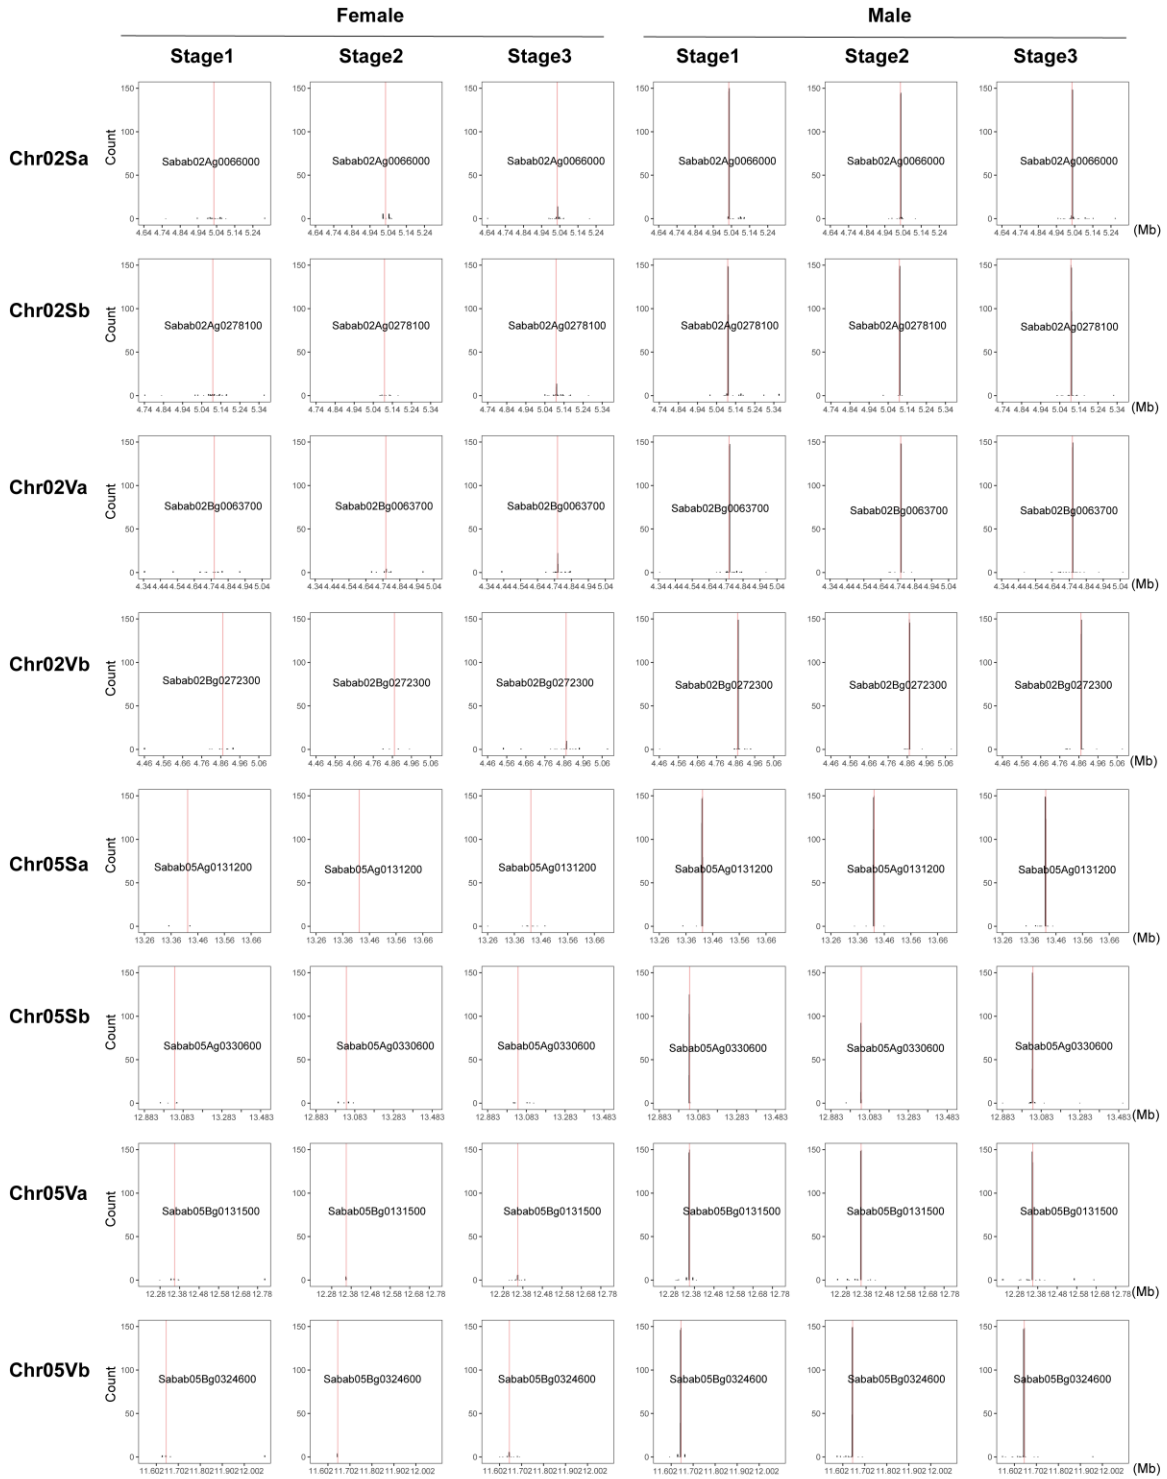

**Supplementary Fig. 17. Transcript level of intact *PI*-like genes of *S. babylonica* across three stages.** Red area indicates exon1 of *PI*-like genes. Source data are provided as a Source Data file.

**Supplementary Table 1. Sequencing information of *S. dunnii* and *S. babylonica*.**

| <b>Sequencing method</b>                    | <i>S. dunnii</i> |                      |           | <i>S. babylonica</i> |                      |            |
|---------------------------------------------|------------------|----------------------|-----------|----------------------|----------------------|------------|
|                                             | HiFi             | Illumina short reads | HiC       | HiFi                 | Illumina short reads | HiC        |
| <b>Total Number of reads</b>                | 2613804          | 268886000            | 247657000 | 2473021              | 526734000            | 1092986000 |
| <b>Total Number of sequenced bases (Gb)</b> | 39.482           | 40.333               | 37.149    | 45.659               | 79.010               | 163.601    |
| <b>N50 (bp)</b>                             | 15650            | 150                  | 150       | 19307                | 150                  | 150        |
| <b>Coverage (X)</b>                         | 112              | 108                  | 107       | 64                   | 94                   | 254        |

**Supplementary Table 2. Gap distribution in genome assembly of *S. babylonica*.**

| <b>Chr</b> | <b>Start</b> | <b>End</b> | <b>Gap length</b> |
|------------|--------------|------------|-------------------|
| chr03Sa/Aa | 4726713      | 4726813    | 100               |
| chr03Sb/Ab | 4671630      | 4671728    | 98                |
| chr04Va/Ba | 18248904     | 18249004   | 100               |
| chr04Va/Ba | 18479352     | 18479452   | 100               |
| chr04Va/Ba | 19215784     | 19215883   | 99                |
| chr04Va/Ba | 19539379     | 19539479   | 100               |
| chr04Vb/Bb | 9162330      | 9162430    | 100               |
| chr04Vb/Bb | 17052173     | 17052273   | 100               |
| chr04Vb/Bb | 17164068     | 17164165   | 97                |
| chr04Vb/Bb | 17846690     | 17846790   | 100               |
| chr07Sa/Aa | 8402332      | 8402432    | 100               |
| chr07Sa/Aa | 17121795     | 17121895   | 100               |
| chr07Sb/Ab | 15644231     | 15644331   | 100               |
| chr07Vb/Bb | 7344360      | 7344458    | 98                |
| chr11Sb/Ab | 9941265      | 9941365    | 100               |
| chr11Va/Ba | 8334071      | 8334171    | 100               |
| chr12Sa/Aa | 6483302      | 6483402    | 100               |
| chr17Sa/Aa | 64135        | 64176      | 41                |
| chr17Sb/Ab | 124864       | 124964     | 100               |
| chr17Sb/Ab | 376658       | 376758     | 100               |
| chr17Sb/Ab | 2734570      | 2734670    | 100               |
| chr18Vb/Bb | 12649511     | 12649611   | 100               |
| chr19Sa/Aa | 2339349      | 2339449    | 100               |
| chr19Sa/Aa | 7419513      | 7419613    | 100               |



**Supplementary Table 3. The BUSCO results of *S. dunnii* and *S. babylonica* (protein).**

|                                 | <i>S. dunnii</i> | <i>S. babylonica</i> |
|---------------------------------|------------------|----------------------|
| Complete BUSCOs                 | 1416 (98.4%)     | 1422 (98.8%)         |
| Complete and single-copy BUSCOs | 24 (1.7%)        | 14 (1.0%)            |
| Complete and duplicated BUSCOs  | 1392 (96.7%)     | 1408 (97.8%)         |
| Fragmented BUSCOs               | 8 (0.6%)         | 6 (0.4%)             |
| Missing BUSCOs                  | 16 (1.0%)        | 12 (0.8%)            |

**Supplementary Table 4. Statistics of protein-coding genes of the genome of *Salix dunnii* and *S. babylonica*.**

|                                     | <i>S. dunnii</i> | <i>S. babylonica</i> |
|-------------------------------------|------------------|----------------------|
| Gene number                         | 65485            | 123231               |
| Transcript number                   | 119374           | 167939               |
| Average gene region length (bp)     | 3683.4           | 3421.6               |
| Average transcript length (bp)      | 2212.4           | 1764.2               |
| Average CDS length (bp)             | 1352             | 1311.9               |
| Average exons per transcript number | 6.4              | 5.9                  |
| Average exon length (bp)            | 346.5            | 298.3                |
| Average intron length (bp)          | 421.7            | 428.3                |

**Supplementary Table 5. Genome datasets used in the paper.**

| <b>Taxa</b>                 | <b>Version</b>  | <b>URL</b>                                                                                                                                                                                        | <b>Reference</b> |
|-----------------------------|-----------------|---------------------------------------------------------------------------------------------------------------------------------------------------------------------------------------------------|------------------|
| <i>Salix suchowensis</i>    | v4.1            | <a href="http://popgenie.org/">http://popgenie.org/</a>                                                                                                                                           | 1                |
| <i>Salix purpurea</i>       | v5.1            | <a href="https://genome.jgi.doe.gov/portal/pages/dynamicOrganismDownload.jsf?organism=Spurpurea">https://genome.jgi.doe.gov/portal/pages/dynamicOrganismDownload.jsf?organism=Spurpurea</a>       | 2                |
| <i>Salix viminalis</i>      | used in         | requested from the first author<br>Pedro Almeida                                                                                                                                                  | 3                |
| <i>Salix brachista</i>      | used in         | <a href="https://www.ncbi.nlm.nih.gov/assembly/GCA_009078335.1">https://www.ncbi.nlm.nih.gov/assembly/GCA_009078335.1</a>                                                                         | 4                |
| <i>Salix babylonica</i>     | saba01F         | This paper                                                                                                                                                                                        |                  |
| <i>Salix arbutifolia</i>    | B649AF          |                                                                                                                                                                                                   | 5                |
| <i>Salix dunnii</i>         | FNU-M-1         | This paper                                                                                                                                                                                        |                  |
| <i>Salix chaenomeloides</i> | GWHBDOA00000000 | <a href="https://ngdc.cncb.ac.cn/gwh/Assembly/21464/show">https://ngdc.cncb.ac.cn/gwh/Assembly/21464/show</a>                                                                                     | 6                |
| <i>Populus trichocarpa</i>  | v4.1            | <a href="https://genome.jgi.doe.gov/portal/pages/dynamicOrganismDownload.jsf?organism=Ptrichocarpa">https://genome.jgi.doe.gov/portal/pages/dynamicOrganismDownload.jsf?organism=Ptrichocarpa</a> |                  |
| <i>Salix suchowensis</i>    | SRR10197854     | <a href="https://www.ncbi.nlm.nih.gov">https://www.ncbi.nlm.nih.gov</a>                                                                                                                           |                  |
| <i>Salix purpurea</i>       | SRR3927002      | <a href="https://www.ncbi.nlm.nih.gov">https://www.ncbi.nlm.nih.gov</a>                                                                                                                           |                  |
| <i>Salix viminalis</i>      | ERR1558612      | <a href="https://www.ncbi.nlm.nih.gov">https://www.ncbi.nlm.nih.gov</a>                                                                                                                           |                  |
| <i>Salix chaenomeloides</i> | SRR16018669     | <a href="https://www.ncbi.nlm.nih.gov">https://www.ncbi.nlm.nih.gov</a>                                                                                                                           |                  |

**Supplementary Table 6. The statistics of gene loss in SLR and PARs.**

| Species               | Region | Type      | Loss gene number | Total gene number | Degradation rate (%) |
|-----------------------|--------|-----------|------------------|-------------------|----------------------|
| <i>S. babylonica</i>  | SLR    | 15Vw Loss | 8                | 282               | 2.84                 |
| <i>S. babylonica</i>  | SLR    | 15Vz Loss | 11               | 282               | 3.90                 |
| <i>S. babylonica</i>  | PARs   | 15Vw Loss | 11               | 886               | 1.24                 |
| <i>S. babylonica</i>  | PARs   | 15Vz Loss | 14               | 886               | 1.58                 |
| <i>S. purpurea</i>    | SLR    | 15W Loss  | 8                | 320               | 2.50                 |
| <i>S. purpurea</i>    | SLR    | 15Z Loss  | 27               | 320               | 8.44                 |
| <i>S. purpurea</i>    | PARs   | 15W Loss  | 2                | 1042              | 0.19                 |
| <i>S. purpurea</i>    | PARs   | 15Z Loss  | 3                | 1042              | 0.29                 |
| <i>S. arbutifolia</i> | SLR    | 15X Loss  | 8                | 87                | 9.20                 |
| <i>S. arbutifolia</i> | SLR    | 15Y Loss  | 10               | 87                | 11.49                |
| <i>S. arbutifolia</i> | PARs   | 15X Loss  | 6                | 1027              | 0.58                 |
| <i>S. arbutifolia</i> | PARs   | 15Y Loss  | 6                | 1027              | 0.58                 |
| <i>S. dunnii</i>      | SLR    | 7X Loss   | 1                | 82                | 1.22                 |
| <i>S. dunnii</i>      | SLR    | 7Y Loss   | 1                | 82                | 1.22                 |
| <i>S. dunnii</i>      | PARs   | 7X Loss   | 6                | 1135              | 0.53                 |
| <i>S. dunnii</i>      | PARs   | 7Y Loss   | 7                | 1135              | 0.62                 |

### Supplementary references

1. Dai, X. *et al.* The willow genome and divergent evolution from poplar after the common genome duplication. *Cell Res.* **24**, 1274–1277 (2014).
2. Zhou, R. *et al.* A willow sex chromosome reveals convergent evolution of complex palindromic repeats. *Genome Biol.* **21**, 1–19 (2020).
3. Almeida, P. *et al.* Genome assembly of the basket willow, *Salix viminalis*, reveals earliest stages of sex chromosome expansion. *BMC Biol.* **18**, 1–18 (2020).
4. Chen, J. *et al.* Genome-wide analysis of Cushion willow provides insights into alpine plant divergence in a biodiversity hotspot. *Nat. Commun.* **10**, 5230 (2019).
5. Wang, Y. *et al.* Gap-free X and Y chromosomes of *Salix arbutifolia* reveal an evolutionary change from male to female heterogamety in willows, without a change in the sex-determining region. *New Phytol.* **242**, 2872–2887 (2024).
6. Wang, D. *et al.* Repeated turnovers keep sex chromosomes young in willows. *Genome Biol.* **23**, 1–23 (2022).
