# Supplementary material for: Allopolyploidization from two dioecious ancestors leads to recurrent evolution of sex chromosomes
Source: PubMed Central journal article supplement — Nat Commun. 2024 Aug 12;15:6893. doi: 10.1038/s41467-024-51158-3 (PMC11319354; doi:10.1038/s41467-024-51158-3), 2024-08-12
Supplement: 41467_2024_51158_MOESM14_ESM.pdf [file 41467_2024_51158_MOESM14_ESM.pdf]

## Reporting Summary

Nature Portfolio wishes to improve the reproducibility of the work that we publish. This form provides structure for consistency and transparency in reporting. For further information on Nature Portfolio policies, see our [Editorial Policies](#) and the [Editorial Policy Checklist](#).

### Statistics

For all statistical analyses, confirm that the following items are present in the figure legend, table legend, main text, or Methods section.

n/a Confirmed

- The exact sample size ( $n$ ) for each experimental group/condition, given as a discrete number and unit of measurement
- A statement on whether measurements were taken from distinct samples or whether the same sample was measured repeatedly
- The statistical test(s) used AND whether they are one- or two-sided  
*Only common tests should be described solely by name; describe more complex techniques in the Methods section.*
- A description of all covariates tested
- A description of any assumptions or corrections, such as tests of normality and adjustment for multiple comparisons
- A full description of the statistical parameters including central tendency (e.g. means) or other basic estimates (e.g. regression coefficient) AND variation (e.g. standard deviation) or associated estimates of uncertainty (e.g. confidence intervals)
- For null hypothesis testing, the test statistic (e.g.  $F$ ,  $t$ ,  $r$ ) with confidence intervals, effect sizes, degrees of freedom and  $P$  value noted  
*Give  $P$  values as exact values whenever suitable.*
- For Bayesian analysis, information on the choice of priors and Markov chain Monte Carlo settings
- For hierarchical and complex designs, identification of the appropriate level for tests and full reporting of outcomes
- Estimates of effect sizes (e.g. Cohen's  $d$ , Pearson's  $r$ ), indicating how they were calculated

*Our web collection on [statistics for biologists](#) contains articles on many of the points above.*

### Software and code

Policy information about [availability of computer code](#)

Data collection

No software was used for data collection.

Data analysis

Summit v.5.2, Jellyfish (v2.3.0), Genomescope (v2.0), Hifiasm (v0.16.1-r375), Juicer (v1.5.6), 3d-dna (v180922), Juicebox(v1.11.08), LR\_Gapcloser (v1.1), Nextpolish (v1.3.1), GetOrganelle (v1.7.5), Redundans (v0.13c), Trinity (v2.0.6), HISAT2 (v2.1.0), StingTie (v1.3.5), CD-HIT (v4.6), PASA (v2.4.1), AUGUSTUS (v3.4.0), MAKER (v2.31.9), Exonerate (2.2.0), RepeatMasker (<http://www.repeatmasker.org/RepeatMasker/>), rmbblast(2.11.0), blast+ (v2.13.0+), EvidenceModeler (v1.1.1), TESorter (v1.4.1), tRNAScan-SE (v1.3.1), RfamScan (v1.0), Barrnap (<https://github.com/tseemann/barrnap>), eggNOG-mapper (v2.0.0), DIAMOND (v0.9.24), InterProScan (v5.27-66.0), EDTA (v1.9.9), OrthoFinder (v2.5.5), MAFFT (v7.515), IQ-TREE (v2.2.0.3), ASTRAL (v5.7.8), PAML (4.10.0), HomBlocks.pl (v1.0), Nucmer (v4.0.0beta2), RepeatModeler (<http://www.repeatmasker.org/>), ggplot2 R package (v3.4.4), fastp (v0.23.2), KMC (v3.1.1), Bowtie (v0.12.9), cq-calculate.pl software (<https://sourceforge.net/projects/cqcalculate/files/CQ-calculate.pl/download>), bwa (v0.7.12), Samtools (v0.1.19), sambamba (v0.7.1), Genome Analysis Toolkit (v4.1.8.1), VCFtools (v0.1.16), ChangePoint R package (v2.2.4), Python version of MCSscan (v1.2.7), BLASTP (v2.5.0+), BLASTN (v2.5.0+), HISAT2 (v2.2.1), featureCounts (v2.0.1), R, Python, sRNAMiner (v1.1.2), IGV (v2.17.1)

For manuscripts utilizing custom algorithms or software that are central to the research but not yet described in published literature, software must be made available to editors and reviewers. We strongly encourage code deposition in a community repository (e.g. GitHub). See the Nature Portfolio [guidelines for submitting code & software](#) for further information.

## Data

Policy information about [availability of data](#)

All manuscripts must include a [data availability statement](#). This statement should provide the following information, where applicable:

- Accession codes, unique identifiers, or web links for publicly available datasets
- A description of any restrictions on data availability
- For clinical datasets or third party data, please ensure that the statement adheres to our [policy](#)

The genome assembly sequences generated in this study have been deposited in the National Genomics Data Center (NGDC) database under BioProject accession code PRJCA016000 [<https://ngdc.cncb.ac.cn/bioproject/browse/PRJCA016000>] and in NCBI database under BioProject accession code: PRJNA1130083 [<https://www.ncbi.nlm.nih.gov/bioproject/?term=PRJNA1130083>], PRJNA1130084 [<https://www.ncbi.nlm.nih.gov/bioproject/?term=PRJNA1130084>], PRJNA1130085 [<https://www.ncbi.nlm.nih.gov/bioproject/?term=PRJNA1130085>], and PRJNA1130087 [<https://www.ncbi.nlm.nih.gov/bioproject/?term=PRJNA1130087>]. The sequencing datasets have been deposited in NCBI under the BioProject accession numbers PRJNA882493, PRJNA1020583, & PRJNA1020619.

## Research involving human participants, their data, or biological material

Policy information about studies with [human participants or human data](#). See also policy information about [sex, gender \(identity/presentation\), and sexual orientation](#) and [race, ethnicity and racism](#).

|                                                                    |                 |
|--------------------------------------------------------------------|-----------------|
| Reporting on sex and gender                                        | Not applicable. |
| Reporting on race, ethnicity, or other socially relevant groupings | Not applicable. |
| Population characteristics                                         | Not applicable. |
| Recruitment                                                        | Not applicable. |
| Ethics oversight                                                   | Not applicable. |

Note that full information on the approval of the study protocol must also be provided in the manuscript.

## Field-specific reporting

Please select the one below that is the best fit for your research. If you are not sure, read the appropriate sections before making your selection.

- Life sciences     Behavioural & social sciences     Ecological, evolutionary & environmental sciences

For a reference copy of the document with all sections, see [nature.com/documents/nr-reporting-summary-flat.pdf](https://nature.com/documents/nr-reporting-summary-flat.pdf)

## Ecological, evolutionary & environmental sciences study design

All studies must disclose on these points even when the disclosure is negative.

|                          |                                                                                                                                                                                                                                                                                                                                                                                                                                                                                                                                                                                                                                                                                                                                                 |
|--------------------------|-------------------------------------------------------------------------------------------------------------------------------------------------------------------------------------------------------------------------------------------------------------------------------------------------------------------------------------------------------------------------------------------------------------------------------------------------------------------------------------------------------------------------------------------------------------------------------------------------------------------------------------------------------------------------------------------------------------------------------------------------|
| Study description        | Allopolyploidization from two dioecious ancestors leads to recurrent evolution of sex chromosomes                                                                                                                                                                                                                                                                                                                                                                                                                                                                                                                                                                                                                                               |
| Research sample          | The study collected young leaves from a male <i>Salix dunnii</i> (FNU-M-1) and female weeping willow <i>S. babylonica</i> (saba01F) plant for genome sequencing. Young leaf, catkin, stem and root samples for transcriptome sequencing were collected from FNU-M-1 and saba01F, as well as catkins from two other female and three male plants of weeping willow, one other female plant of <i>S. dunnii</i> . In October 2023 (stage 1), December 2023 (stage 2), and February 2024 (stage 3), flower buds from the three male and three female individuals of <i>S. babylonica</i> for small RNA sequencing and mRNA sequencing. The leaves of 40 individuals of <i>S. babylonica</i> were sampled and dried in silica-gel for resequencing. |
| Sampling strategy        | The individual number of <i>S. babylonica</i> was according to previously works (He et al., 2021, 10.1111/1755-0998.13362; He et al., 2023, 10.1111/mec.16902).                                                                                                                                                                                                                                                                                                                                                                                                                                                                                                                                                                                 |
| Data collection          | The study downloaded genome sequence data of 38 individuals of <i>S. dunnii</i> published by He et al. (2021, 10.1111/1755-0998.13362), the genome of <i>S. arbutifolia</i> (Wang et al., 2024, <a href="https://doi.org/10.1111/nph.19744">https://doi.org/10.1111/nph.19744</a> , with gap-free 15X and 15Y sex chromosomes), and other available willows genomes and <i>Populus trichocarpa</i> for relevant analysis.                                                                                                                                                                                                                                                                                                                       |
| Timing and spatial scale | Not applicable.                                                                                                                                                                                                                                                                                                                                                                                                                                                                                                                                                                                                                                                                                                                                 |
| Data exclusions          | No data was excluded in this analysis.                                                                                                                                                                                                                                                                                                                                                                                                                                                                                                                                                                                                                                                                                                          |
| Reproducibility          | Not applicable.                                                                                                                                                                                                                                                                                                                                                                                                                                                                                                                                                                                                                                                                                                                                 |
| Randomization            | Randomization was not relevant to this study.                                                                                                                                                                                                                                                                                                                                                                                                                                                                                                                                                                                                                                                                                                   |

Blinding

Did the study involve field work?  Yes  No

## Field work, collection and transport

Field conditions

Location

Access & import/export

Disturbance

## Reporting for specific materials, systems and methods

We require information from authors about some types of materials, experimental systems and methods used in many studies. Here, indicate whether each material, system or method listed is relevant to your study. If you are not sure if a list item applies to your research, read the appropriate section before selecting a response.

### Materials & experimental systems

- | n/a                                 | Involvement                         | Material/System               |
|-------------------------------------|-------------------------------------|-------------------------------|
| <input checked="" type="checkbox"/> | <input type="checkbox"/>            | Antibodies                    |
| <input checked="" type="checkbox"/> | <input type="checkbox"/>            | Eukaryotic cell lines         |
| <input checked="" type="checkbox"/> | <input type="checkbox"/>            | Palaeontology and archaeology |
| <input checked="" type="checkbox"/> | <input type="checkbox"/>            | Animals and other organisms   |
| <input checked="" type="checkbox"/> | <input type="checkbox"/>            | Clinical data                 |
| <input checked="" type="checkbox"/> | <input type="checkbox"/>            | Dual use research of concern  |
| <input type="checkbox"/>            | <input checked="" type="checkbox"/> | Plants                        |

### Methods

- | n/a                                 | Involvement                         | Method                 |
|-------------------------------------|-------------------------------------|------------------------|
| <input checked="" type="checkbox"/> | <input type="checkbox"/>            | ChIP-seq               |
| <input type="checkbox"/>            | <input checked="" type="checkbox"/> | Flow cytometry         |
| <input checked="" type="checkbox"/> | <input type="checkbox"/>            | MRI-based neuroimaging |

## Dual use research of concern

Policy information about [dual use research of concern](#)

### Hazards

Could the accidental, deliberate or reckless misuse of agents or technologies generated in the work, or the application of information presented in the manuscript, pose a threat to:

- | No                                  | Yes                      |                            |
|-------------------------------------|--------------------------|----------------------------|
| <input checked="" type="checkbox"/> | <input type="checkbox"/> | Public health              |
| <input checked="" type="checkbox"/> | <input type="checkbox"/> | National security          |
| <input checked="" type="checkbox"/> | <input type="checkbox"/> | Crops and/or livestock     |
| <input checked="" type="checkbox"/> | <input type="checkbox"/> | Ecosystems                 |
| <input checked="" type="checkbox"/> | <input type="checkbox"/> | Any other significant area |

### Experiments of concern

Does the work involve any of these experiments of concern:

- | No                                  | Yes                      |                                                                             |
|-------------------------------------|--------------------------|-----------------------------------------------------------------------------|
| <input checked="" type="checkbox"/> | <input type="checkbox"/> | Demonstrate how to render a vaccine ineffective                             |
| <input checked="" type="checkbox"/> | <input type="checkbox"/> | Confer resistance to therapeutically useful antibiotics or antiviral agents |
| <input checked="" type="checkbox"/> | <input type="checkbox"/> | Enhance the virulence of a pathogen or render a nonpathogen virulent        |
| <input checked="" type="checkbox"/> | <input type="checkbox"/> | Increase transmissibility of a pathogen                                     |
| <input checked="" type="checkbox"/> | <input type="checkbox"/> | Alter the host range of a pathogen                                          |
| <input checked="" type="checkbox"/> | <input type="checkbox"/> | Enable evasion of diagnostic/detection modalities                           |
| <input checked="" type="checkbox"/> | <input type="checkbox"/> | Enable the weaponization of a biological agent or toxin                     |
| <input checked="" type="checkbox"/> | <input type="checkbox"/> | Any other potentially harmful combination of experiments and agents         |

## Plants

Seed stocks

Not applicable.

Novel plant genotypes

Not applicable.

Authentication

Not applicable.

## Flow Cytometry

### Plots

Confirm that:

- The axis labels state the marker and fluorochrome used (e.g. CD4-FITC).
- The axis scales are clearly visible. Include numbers along axes only for bottom left plot of group (a 'group' is an analysis of identical markers).
- All plots are contour plots with outliers or pseudocolor plots.
- A numerical value for number of cells or percentage (with statistics) is provided.

### Methodology

Sample preparation

The samples' leaves were dried in silica-gel. The leaf tissue was incubated for 80 min in 1 mL LB01 buffer and chopped with a razor blade.

|                           |                                                                                                               |
|---------------------------|---------------------------------------------------------------------------------------------------------------|
| Instrument                | MoFlo-XDP flow cytometer.                                                                                     |
| Software                  | Summit v.5.2.                                                                                                 |
| Cell population abundance | Flow cytometry was used for ploidy level estimation purpose only, and no post-sorting fraction was collected. |
| Gating strategy           | The F13-Height gate method was used to eliminate debris, cell fragments, and dead cells.                      |

Tick this box to confirm that a figure exemplifying the gating strategy is provided in the Supplementary Information.
